# Supplementary material for: Resilience and CVD-protective Health Behaviors in Older Women: Examining Racial and Ethnic Differences in a Cross-Sectional Analysis of the Women’s Health Initiative
Source: PubMed Central journal article supplement (PMC7400950; doi:10.3390/nu12072107), 2020-07-16
Supplement: nutrients-12-02107-s001.pdf [file nutrients-12-02107-s001.pdf]

Supplemental Materials:

**Table 1.** Results from full model including interaction between race/ethnicity and resilience.

| Outcome                                                                                | Race/Ethnicity Category   | Resilience Category | OR (95% CI)*       | P-Value** |
|----------------------------------------------------------------------------------------|---------------------------|---------------------|--------------------|-----------|
| Non-smoker<br>(y/n)                                                                    | Black or African American | Low                 | Ref                | 0.80      |
|                                                                                        | Black or African American | Medium              | 0.79 (0.45, 1.39)  |           |
|                                                                                        | Black or African American | High                | 0.93 (0.53, 1.63)  |           |
|                                                                                        | Non-Hispanic white        | Low                 | 1.57 (0.90, 2.75)  |           |
|                                                                                        | Non-Hispanic white        | Medium              | 1.66 (0.98, 2.80)  |           |
|                                                                                        | Non-Hispanic white        | High                | 1.68 (0.99, 2.85)  |           |
|                                                                                        | Asian or Pacific Islander | Low                 | 3.32 (0.43, 25.59) |           |
|                                                                                        | Asian or Pacific Islander | Medium              | 3.58 (1.54, 8.34)  |           |
|                                                                                        | Asian or Pacific Islander | High                | 3.11 (1.29, 7.50)  |           |
|                                                                                        | Hispanic/Latina           | Low                 | 3.17 (0.90, 11.13) |           |
|                                                                                        | Hispanic/Latina           | Medium              | 1.49 (0.79, 2.80)  |           |
|                                                                                        | Hispanic/Latina           | High                | 1.58 (0.82, 3.05)  |           |
| Moderate alcohol<br>use<br>(had alcoholic<br>drink(s) 1–7<br>time(s) per week,<br>y/n) | Black or African American | Low                 | Ref                | 0.77      |
|                                                                                        | Black or African American | Medium              | 1.11 (0.80, 1.55)  |           |
|                                                                                        | Black or African American | High                | 1.08 (0.78, 1.50)  |           |
|                                                                                        | Non-Hispanic white        | Low                 | 2.36 (1.73, 3.23)  |           |
|                                                                                        | Non-Hispanic white        | Medium              | 2.86 (2.10, 3.88)  |           |
|                                                                                        | Non-Hispanic white        | High                | 3.05 (2.25, 4.14)  |           |
|                                                                                        | Asian or Pacific Islander | Low                 | 0.35 (0.16, 0.78)  |           |
|                                                                                        | Asian or Pacific Islander | Medium              | 0.52 (0.36, 0.75)  |           |
|                                                                                        | Asian or Pacific Islander | High                | 0.62 (0.43, 0.91)  |           |
|                                                                                        | Hispanic/Latina           | Low                 | 1.36 (0.83, 2.25)  |           |
|                                                                                        | Hispanic/Latina           | Medium              | 1.51 (1.07, 2.15)  |           |
|                                                                                        | Hispanic/Latina           | High                | 1.74 (1.23, 2.45)  |           |
| Hours of sleep<br>(7–9 h, y/n)                                                         | Black or African American | Low                 | Ref                | 0.03      |
|                                                                                        | Black or African American | Medium              | 0.89 (0.72, 1.12)  |           |
|                                                                                        | Black or African American | High                | 1.21 (0.97, 1.51)  |           |
|                                                                                        | Non-Hispanic white        | Low                 | 1.85 (1.50, 2.29)  |           |
|                                                                                        | Non-Hispanic white        | Medium              | 2.14 (1.74, 2.63)  |           |
|                                                                                        | Non-Hispanic white        | High                | 2.55 (2.08, 3.14)  |           |
|                                                                                        | Asian or Pacific Islander | Low                 | 0.49 (0.30, 0.79)  |           |
|                                                                                        | Asian or Pacific Islander | Medium              | 0.84 (0.66, 1.08)  |           |
|                                                                                        | Asian or Pacific Islander | High                | 0.82 (0.64, 1.06)  |           |
|                                                                                        | Hispanic/Latina           | Low                 | 1.56 (1.08, 2.25)  |           |
|                                                                                        | Hispanic/Latina           | Medium              | 1.54 (1.20, 1.96)  |           |
|                                                                                        | Hispanic/Latina           | High                | 1.70 (1.32, 2.18)  |           |

|                                                  |                           |        |                   |      |
|--------------------------------------------------|---------------------------|--------|-------------------|------|
| Physical activity<br>(≥150 min per<br>week, y/n) | Black or African American | Low    | Ref               | 0.22 |
|                                                  | Black or African American | Medium | 1.05 (0.82, 1.35) |      |
|                                                  | Black or African American | High   | 1.19 (0.93, 1.52) |      |
|                                                  | Non-Hispanic white        | Low    | 0.94 (0.74, 1.20) |      |
|                                                  | Non-Hispanic white        | Medium | 1.17 (0.93, 1.48) |      |
|                                                  | Non-Hispanic white        | High   | 1.51 (1.20, 1.90) |      |
|                                                  | Asian or Pacific Islander | Low    | 1.12 (0.68, 1.83) |      |
|                                                  | Asian or Pacific Islander | Medium | 1.36 (1.03, 1.78) |      |
|                                                  | Asian or Pacific Islander | High   | 1.76 (1.33, 2.34) |      |
|                                                  | Hispanic/Latina           | Low    | 1.14 (0.77, 1.68) |      |
|                                                  | Hispanic/Latina           | Medium | 1.40 (1.07, 1.84) |      |
|                                                  | Hispanic/Latina           | High   | 1.60 (1.22, 2.10) |      |
| Diet quality<br>(top two<br>quintiles, y/n)      | Black or African American | Low    | Ref               | 0.94 |
|                                                  | Black or African American | Medium | 1.15 (0.89, 1.47) |      |
|                                                  | Black or African American | High   | 1.34 (1.05, 1.72) |      |
|                                                  | Non-Hispanic white        | Low    | 1.13 (0.89, 1.43) |      |
|                                                  | Non-Hispanic white        | Medium | 1.22 (0.97, 1.54) |      |
|                                                  | Non-Hispanic white        | High   | 1.36 (1.08, 1.72) |      |
|                                                  | Asian or Pacific Islander | Low    | 0.80 (0.48, 1.31) |      |
|                                                  | Asian or Pacific Islander | Medium | 0.89 (0.67, 1.16) |      |
|                                                  | Asian or Pacific Islander | High   | 1.02 (0.77, 1.35) |      |
|                                                  | Hispanic/Latina           | Low    | 0.86 (0.57, 1.31) |      |
|                                                  | Hispanic/Latina           | Medium | 0.89 (0.68, 1.17) |      |
|                                                  | Hispanic/Latina           | High   | 1.10 (0.83, 1.44) |      |

\*odds ratio with 95% confidence interval \*\*corresponds to test of whether there is effect modification by race/ethnicity.

**Table 2.** Sensitivity analysis: estimated associations between self-reported psychological resilience and CVD-protective health behaviors, adjusted for stressful life events (SLEs), sociodemographic information (age, race/ethnicity, and education), depression and additional CVD-protective risk factors (BMI, diabetes, hypertension, and dyslipidemia).

| title                                         | SLEs                                                                            |
|-----------------------------------------------|---------------------------------------------------------------------------------|
| <b>Outcome</b>                                | <b>Sociodemographic, depression<br/>Additional CVD risk factors<br/>Model 3</b> |
|                                               | <b>BRS medium:</b>                                                              |
| Diet quality (top 2<br>quintiles, y/n)        | 1.06 (1.00, 1.13)                                                               |
|                                               | <b>BRS high:</b>                                                                |
|                                               | 1.18 (1.11, 1.26)                                                               |
|                                               | <b>BRS medium:</b>                                                              |
| Non-smoker (y/n)                              | 0.88 (0.73, 1.06)                                                               |
|                                               | <b>BRS high:</b>                                                                |
|                                               | 0.87 (0.71, 1.06)                                                               |
| Physical activity (≥150 min<br>per week, y/n) | <b>BRS medium:</b>                                                              |
|                                               | 1.14 (1.07, 1.22)                                                               |

|                                                                   |                    |
|-------------------------------------------------------------------|--------------------|
|                                                                   | <b>BRS high:</b>   |
|                                                                   | 1.42 (1.33, 1.51)  |
|                                                                   | <b>BRS medium:</b> |
| Hours of sleep (7–9 h, y/n)                                       | 1.05 (0.98, 1.11)  |
|                                                                   | <b>BRS high:</b>   |
|                                                                   | 1.21 (1.14, 1.29)  |
|                                                                   | <b>BRS medium:</b> |
| Alcohol intake (had alcoholic drink(s) 1–7 time(s) per week, y/n) | 1.16 (1.09, 1.24)  |
|                                                                   | <b>BRS high:</b>   |
|                                                                   | 1.23 (1.15, 1.32)  |

**Table 3.** Sensitivity analysis: results from full model including interaction between race/ethnicity and resilience.

| Outcome                                                                 | Race/Ethnicity Category   | Resilience Category | OR (95% CI)        | P-Value |
|-------------------------------------------------------------------------|---------------------------|---------------------|--------------------|---------|
| Non-smoker (y/n)                                                        | Black or African American | Low                 | Ref                | 0.92    |
|                                                                         | Black or African American | Medium              | 0.75 (0.42, 1.35)  |         |
|                                                                         | Black or African American | High                | 0.83 (0.46, 1.49)  |         |
|                                                                         | Non-Hispanic white        | Low                 | 1.71 (0.95, 3.07)  |         |
|                                                                         | Non-Hispanic white        | Medium              | 1.57 (0.91, 2.72)  |         |
|                                                                         | Non-Hispanic white        | High                | 1.53 (0.88, 2.66)  |         |
|                                                                         | Asian or Pacific Islander | Low                 | 3.09 (0.40, 23.94) |         |
|                                                                         | Asian or Pacific Islander | Medium              | 3.32 (1.39, 7.94)  |         |
|                                                                         | Asian or Pacific Islander | High                | 2.98 (1.23, 7.22)  |         |
|                                                                         | Hispanic/Latina           | Low                 | 2.97 (0.80, 11.00) |         |
|                                                                         | Hispanic/Latina           | Medium              | 1.42 (0.73, 2.74)  |         |
| Hispanic/Latina                                                         | High                      | 1.44 (0.73, 2.84)   |                    |         |
| Moderate alcohol use (had alcoholic drink(s) 1–7 time(s) per week, y/n) | Black or African American | Low                 | Ref                | 0.77    |
|                                                                         | Black or African American | Medium              | 1.08 (0.78, 1.49)  |         |
|                                                                         | Black or African American | High                | 1.04 (0.76, 1.44)  |         |
|                                                                         | Non-Hispanic white        | Low                 | 2.39 (1.76, 3.24)  |         |
|                                                                         | Non-Hispanic white        | Medium              | 2.79 (2.06, 3.76)  |         |
|                                                                         | Non-Hispanic white        | High                | 2.95 (2.18, 3.98)  |         |
|                                                                         | Asian or Pacific Islander | Low                 | 0.34 (0.16, 0.76)  |         |
|                                                                         | Asian or Pacific Islander | Medium              | 0.49 (0.34, 0.71)  |         |
|                                                                         | Asian or Pacific Islander | High                | 0.60 (0.41, 0.86)  |         |
|                                                                         | Hispanic/Latina           | Low                 | 1.36 (0.83, 2.22)  |         |
|                                                                         | Hispanic/Latina           | Medium              | 1.48 (1.05, 2.08)  |         |
| Hispanic/Latina                                                         | High                      | 1.67 (1.19, 2.35)   |                    |         |
| Hours of sleep (7–9 h, y/n)                                             | Black or African American | Low                 | Ref                | 0.03    |
|                                                                         | Black or African American | Medium              | 0.84 (0.67, 1.05)  |         |
|                                                                         | Black or African American | High                | 1.10 (0.88, 1.37)  |         |
|                                                                         | Non-Hispanic white        | Low                 | 1.92 (1.55, 2.37)  |         |
|                                                                         | Non-Hispanic white        | Medium              | 2.03 (1.65, 2.49)  |         |
|                                                                         | Non-Hispanic white        | High                | 2.35 (1.91, 2.88)  |         |
|                                                                         | Asian or Pacific Islander | Low                 | 0.46 (0.28, 0.75)  |         |

|                                                   |                           |        |                   |      |
|---------------------------------------------------|---------------------------|--------|-------------------|------|
|                                                   | Asian or Pacific Islander | Medium | 0.79 (0.62, 1.02) |      |
|                                                   | Asian or Pacific Islander | High   | 0.76 (0.59, 0.98) |      |
|                                                   | Hispanic/Latina           | Low    | 1.58 (1.09, 2.28) |      |
|                                                   | Hispanic/Latina           | Medium | 1.47 (1.15, 1.87) |      |
|                                                   | Hispanic/Latina           | High   | 1.56 (1.22, 2.00) |      |
| Physical activity ( $\geq 150$ min per week, y/n) | Black or African American | Low    | Ref               | 0.26 |
|                                                   | Black or African American | Medium | 1.00 (0.78, 1.28) |      |
|                                                   | Black or African American | High   | 1.10 (0.86, 1.40) |      |
|                                                   | Non-Hispanic white        | Low    | 0.98 (0.77, 1.23) |      |
|                                                   | Non-Hispanic white        | Medium | 1.13 (0.90, 1.41) |      |
|                                                   | Non-Hispanic white        | High   | 1.41 (1.12, 1.77) |      |
|                                                   | Asian or Pacific Islander | Low    | 1.04 (0.63, 1.69) |      |
|                                                   | Asian or Pacific Islander | Medium | 1.29 (0.99, 1.69) |      |
|                                                   | Asian or Pacific Islander | High   | 1.66 (1.25, 2.19) |      |
|                                                   | Hispanic/Latina           | Low    | 1.16 (0.78, 1.72) |      |
|                                                   | Hispanic/Latina           | Medium | 1.34 (1.03, 1.76) |      |
|                                                   | Hispanic/Latina           | High   | 1.50 (1.15, 1.96) |      |
| Diet quality (top two quintiles, y/n)             | Black or African American | Low    | Ref               | 0.93 |
|                                                   | Black or African American | Medium | 1.14 (0.89, 1.46) |      |
|                                                   | Black or African American | High   | 1.32 (1.03, 1.69) |      |
|                                                   | Non-Hispanic white        | Low    | 1.14 (0.90, 1.45) |      |
|                                                   | Non-Hispanic white        | Medium | 1.21 (0.96, 1.52) |      |
|                                                   | Non-Hispanic white        | High   | 1.34 (1.06, 1.69) |      |
|                                                   | Asian or Pacific Islander | Low    | 0.79 (0.48, 1.29) |      |
|                                                   | Asian or Pacific Islander | Medium | 0.88 (0.67, 1.16) |      |
|                                                   | Asian or Pacific Islander | High   | 1.00 (0.76, 1.32) |      |
|                                                   | Hispanic/Latina           | Low    | 0.87 (0.58, 1.32) |      |
|                                                   | Hispanic/Latina           | Medium | 0.89 (0.67, 1.17) |      |
|                                                   | Hispanic/Latina           | High   | 1.08 (0.82, 1.42) |      |

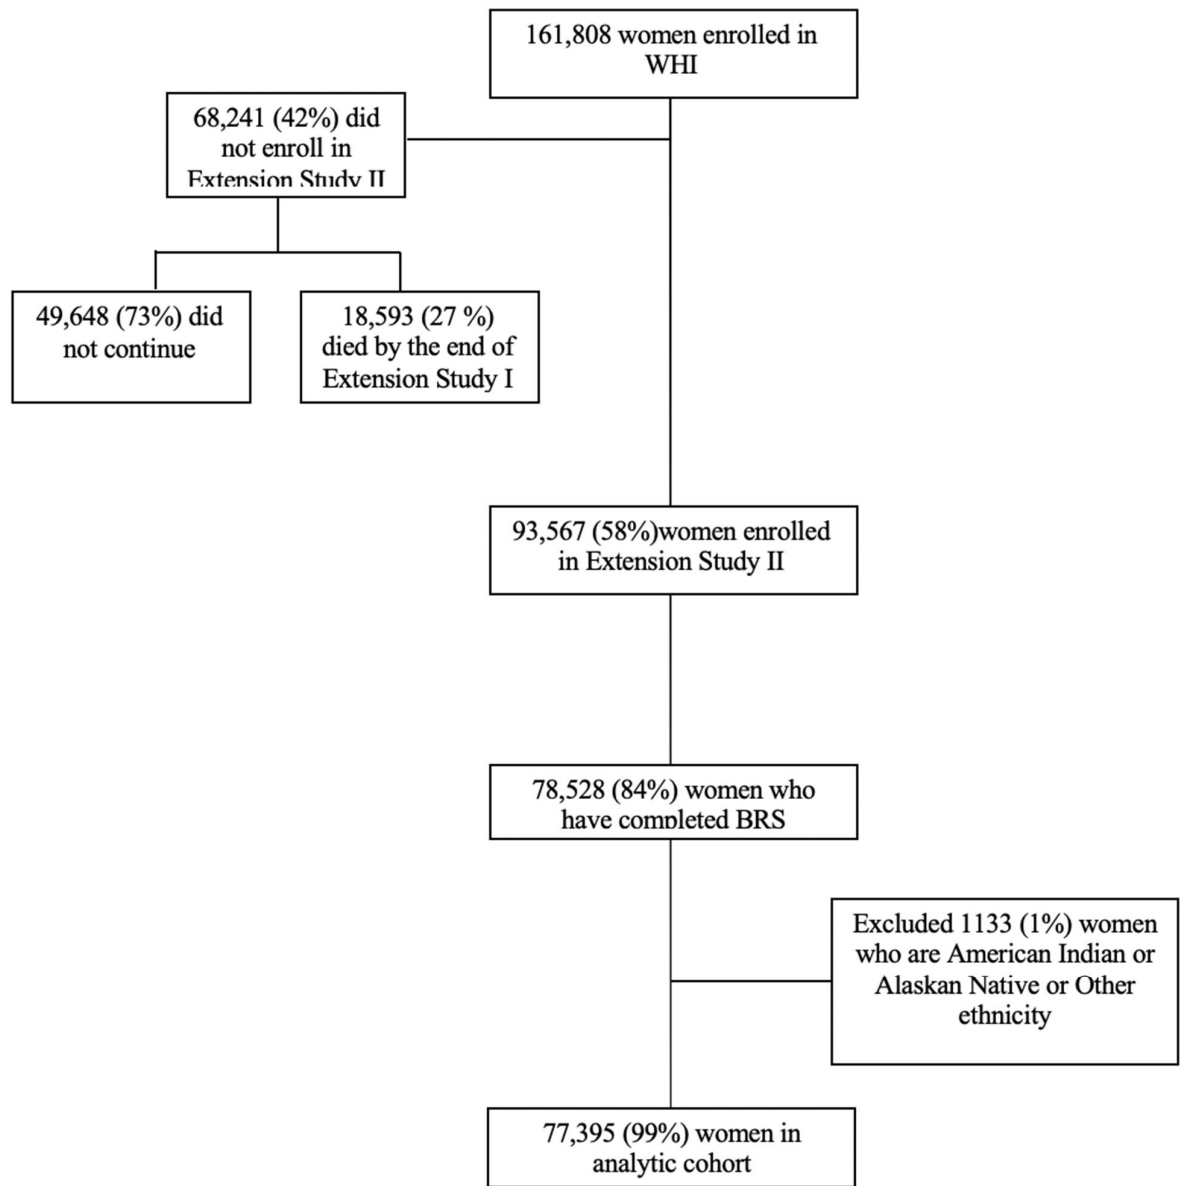

Figure S1: Study flowchart illustrating participant dropout.

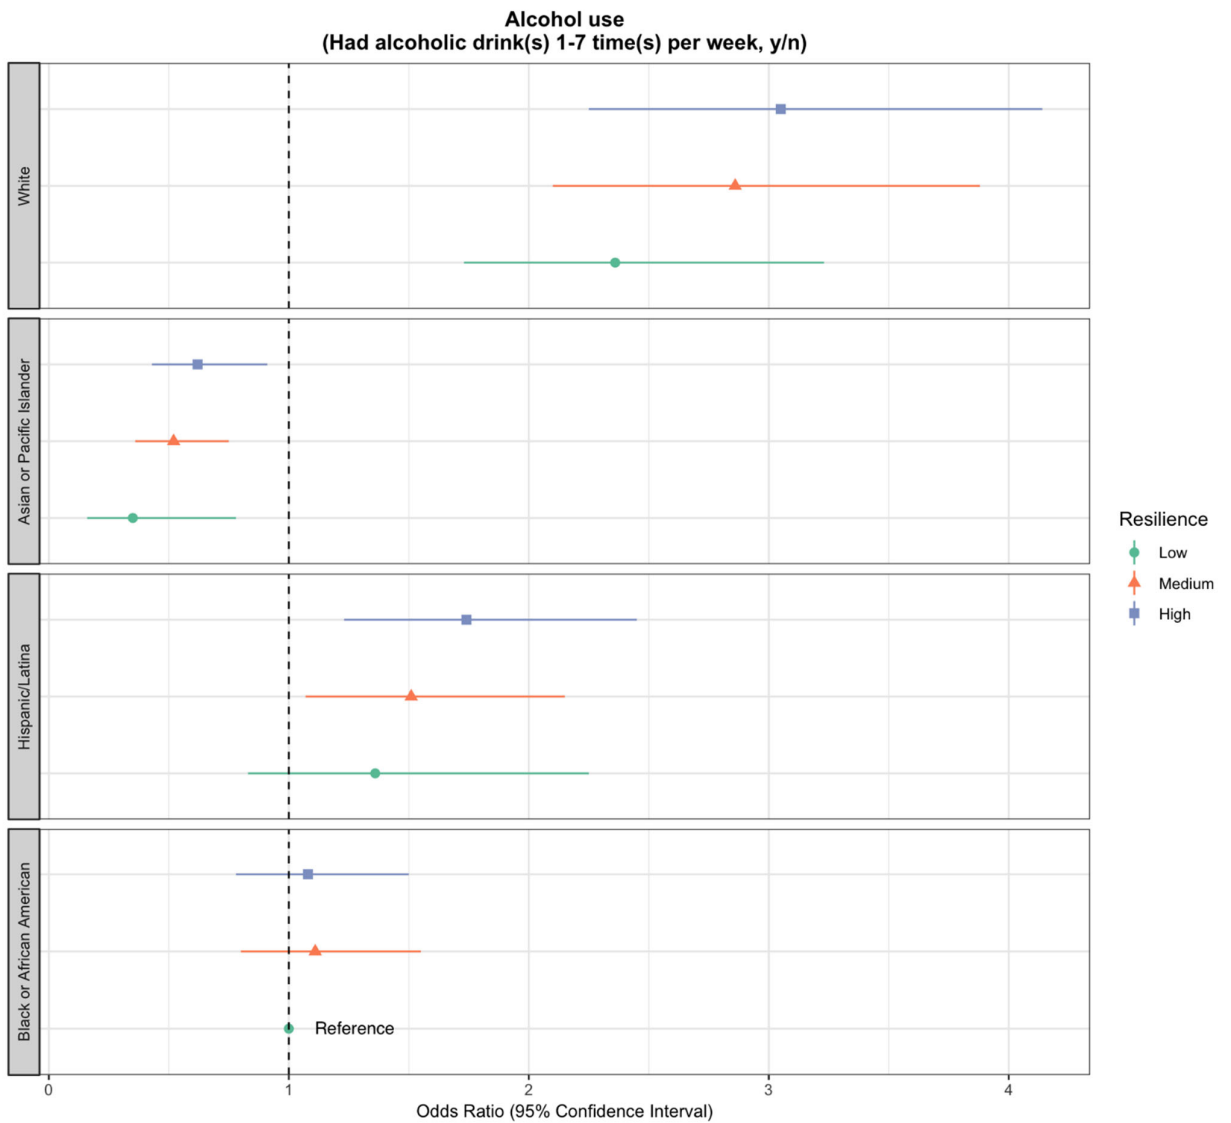

**Figure 2.** Estimated associations between self-reported psychological resilience and moderate alcohol use, multivariable linear regression adjusted for stressful life events (SLEs), sociodemographic factors (age, race/ethnicity, and education), additional CVD-protective risk factors (BMI, diabetes, hypertension, and high cholesterol), and interaction between race/ethnicity and resilience.

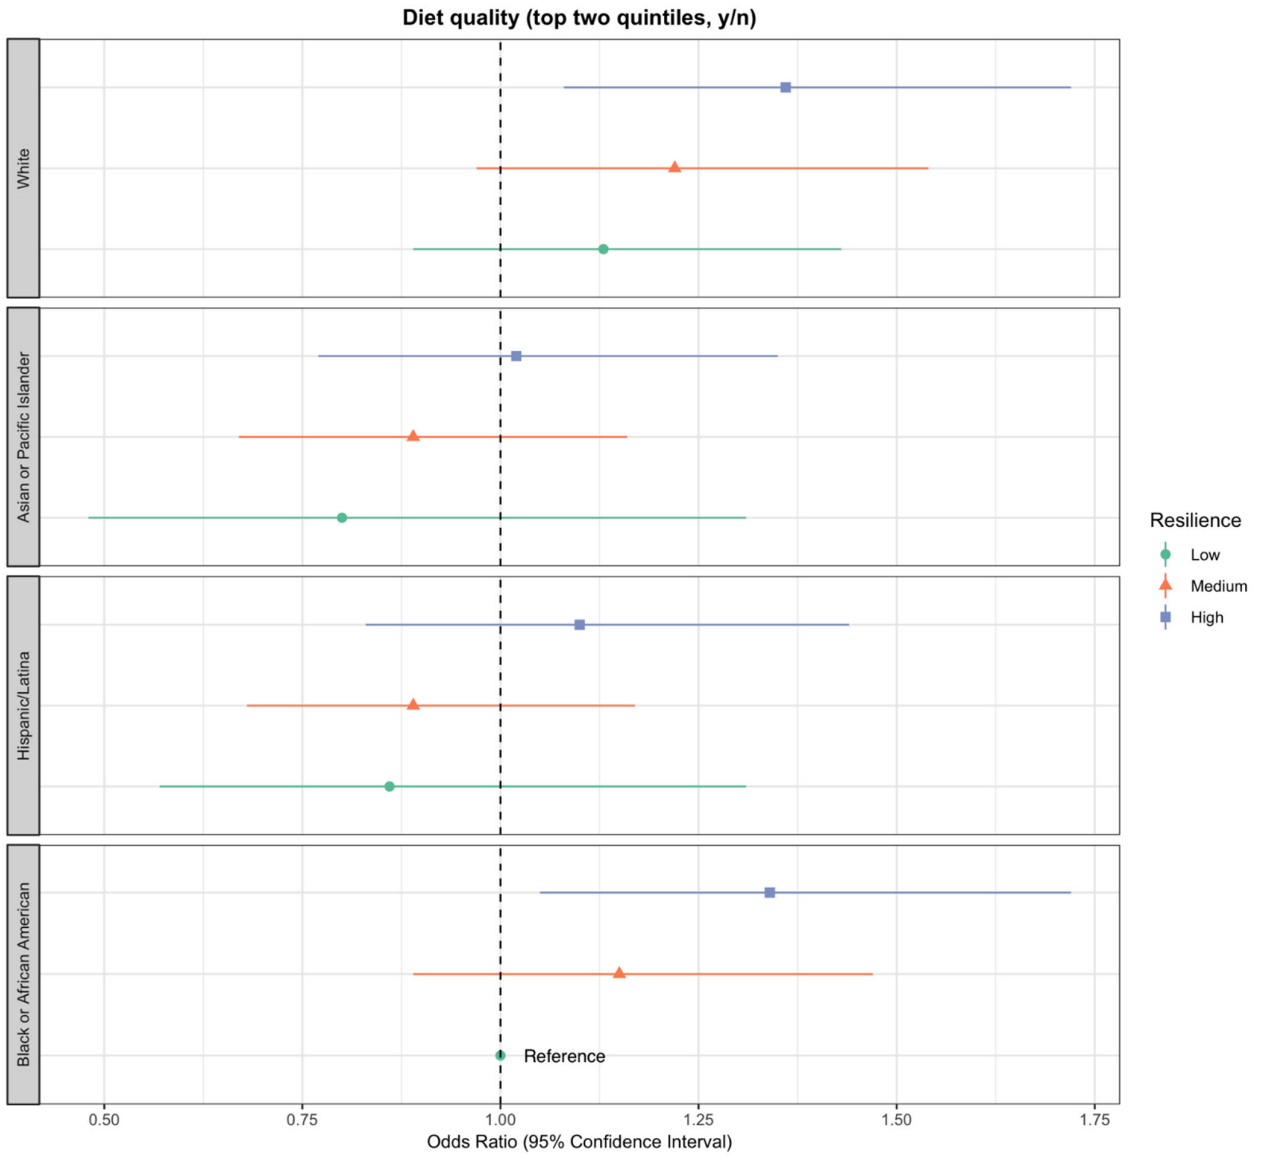

**Figure 3.** Estimated associations between self-reported psychological resilience and better diet quality, multivariable linear regression adjusted for stressful life events (SLEs), sociodemographic factors (age, race/ethnicity, and education), additional CVD-protective risk factors (BMI, diabetes, hypertension, and high cholesterol), and interaction between race/ethnicity and resilience.

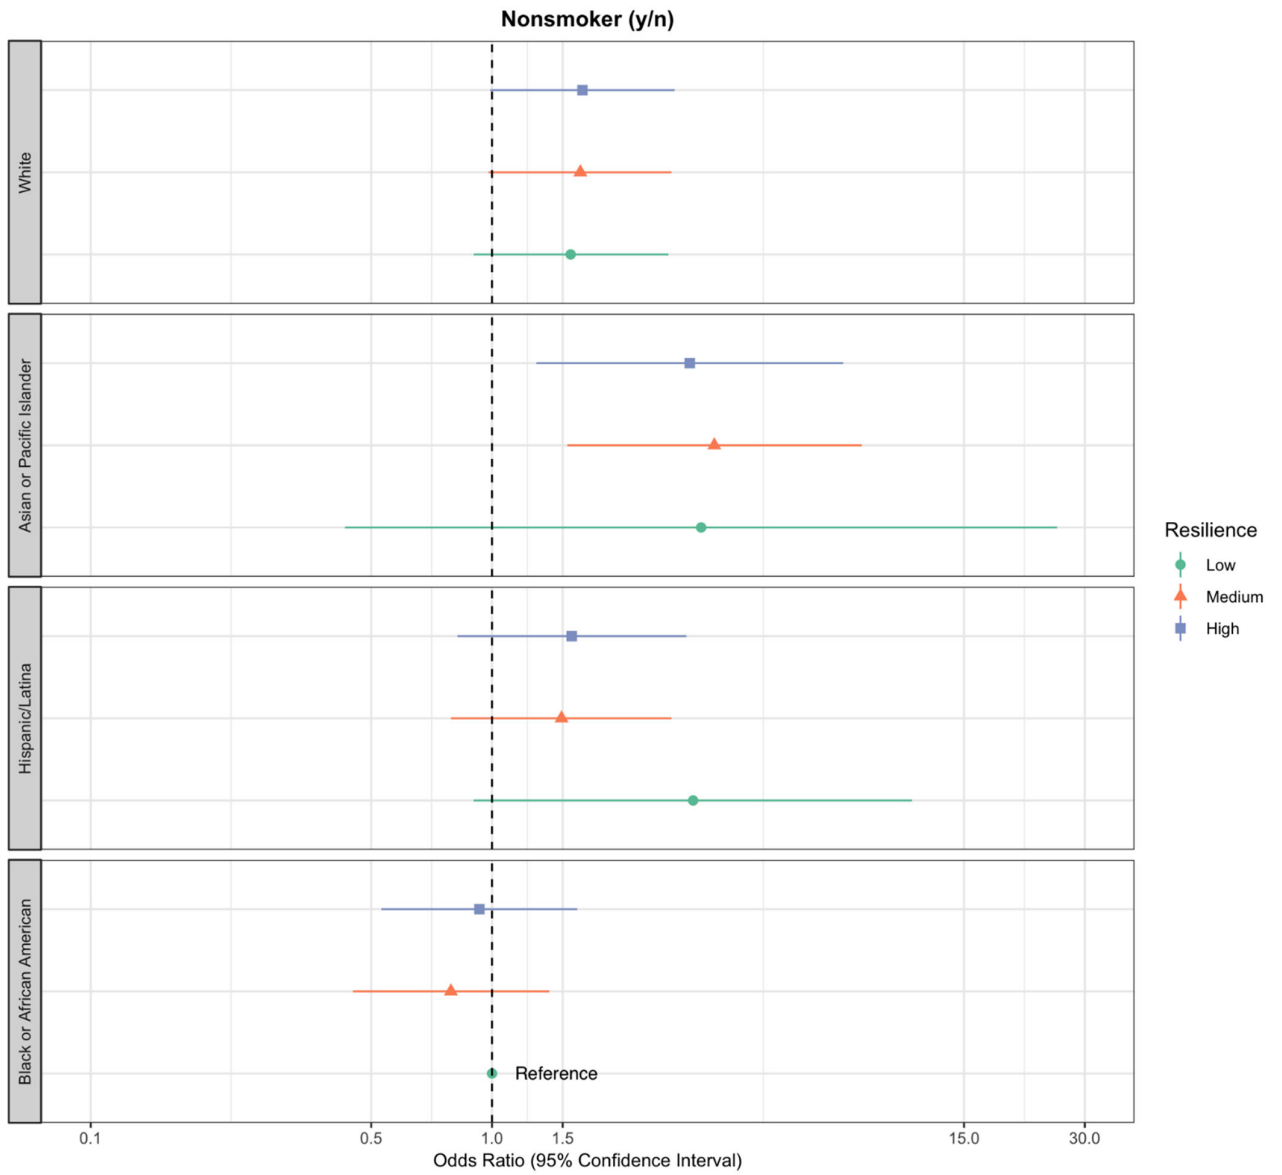

**Figure 4.** Estimated associations between self-reported psychological resilience and being current non-smoker, multivariable linear regression adjusted for stressful life events (SLEs), sociodemographic factors (age, race/ethnicity, and education), additional CVD-protective risk factors (BMI, diabetes, hypertension, and high cholesterol), and interaction between race/ethnicity and resilience.



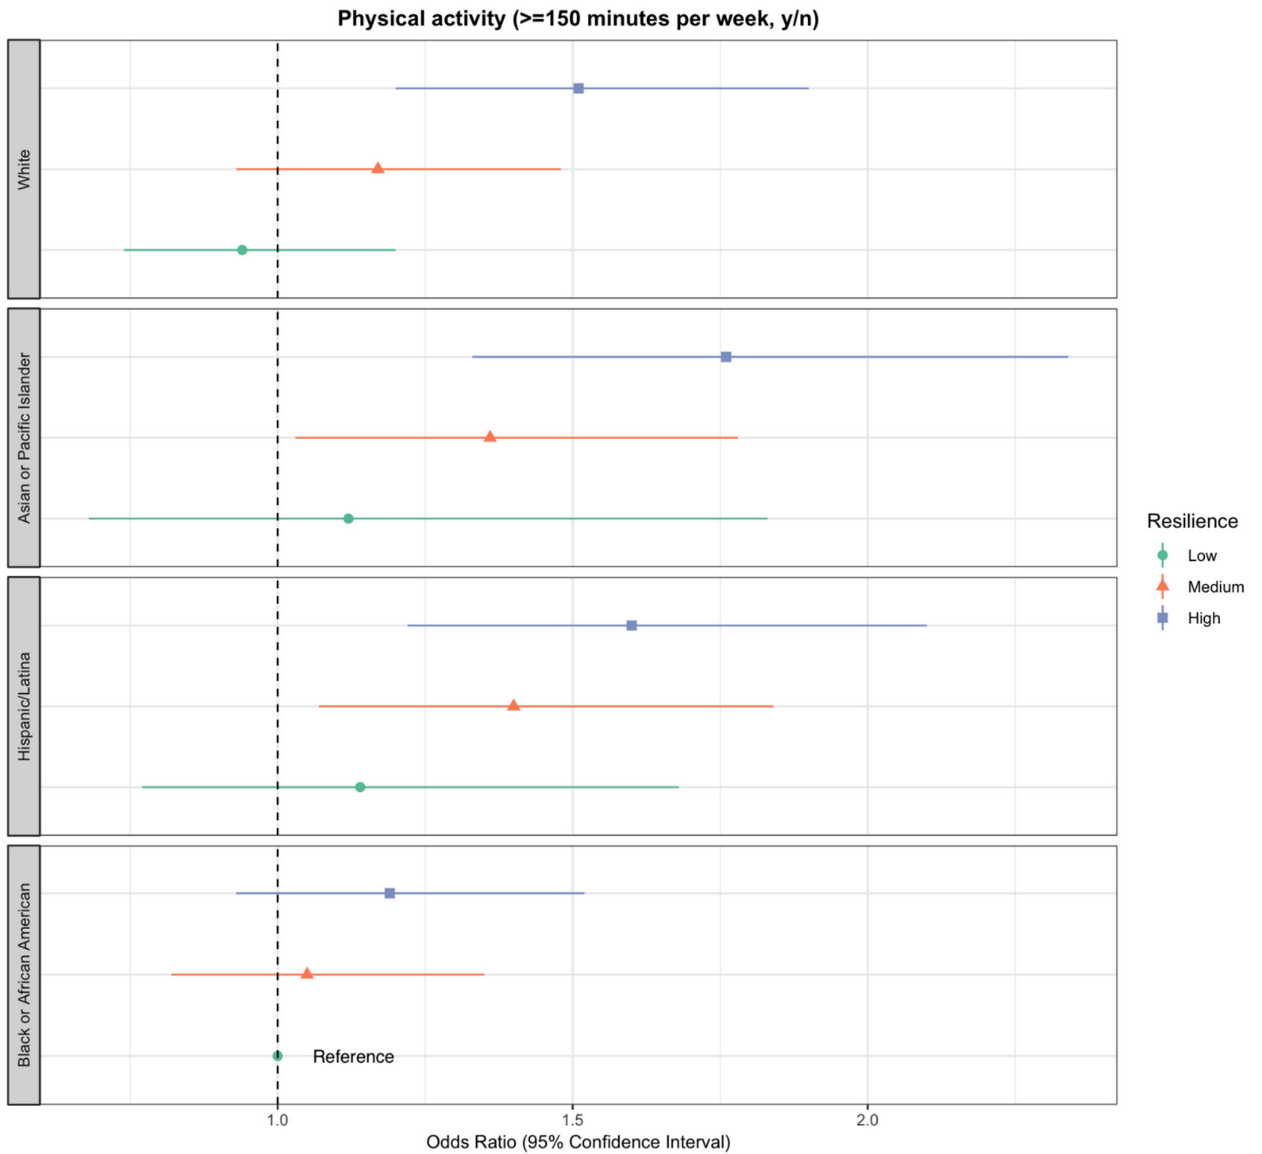

**Figure 5.** Estimated associations between self-reported psychological resilience and recommended physical activity, multivariable linear regression adjusted for stressful life events (SLEs), sociodemographic factors (age, race/ethnicity, and education), additional CVD-protective risk factors (BMI, diabetes, hypertension, and high cholesterol), and interaction between race/ethnicity and resilience.
